# Supplementary figures and images for: Self-assembly of amorphous biophotonic nanostructures by phase separation
Source: Royal Society of Chemistry journal article supplement (doi:10.1039/b902775k), 2009-01-01

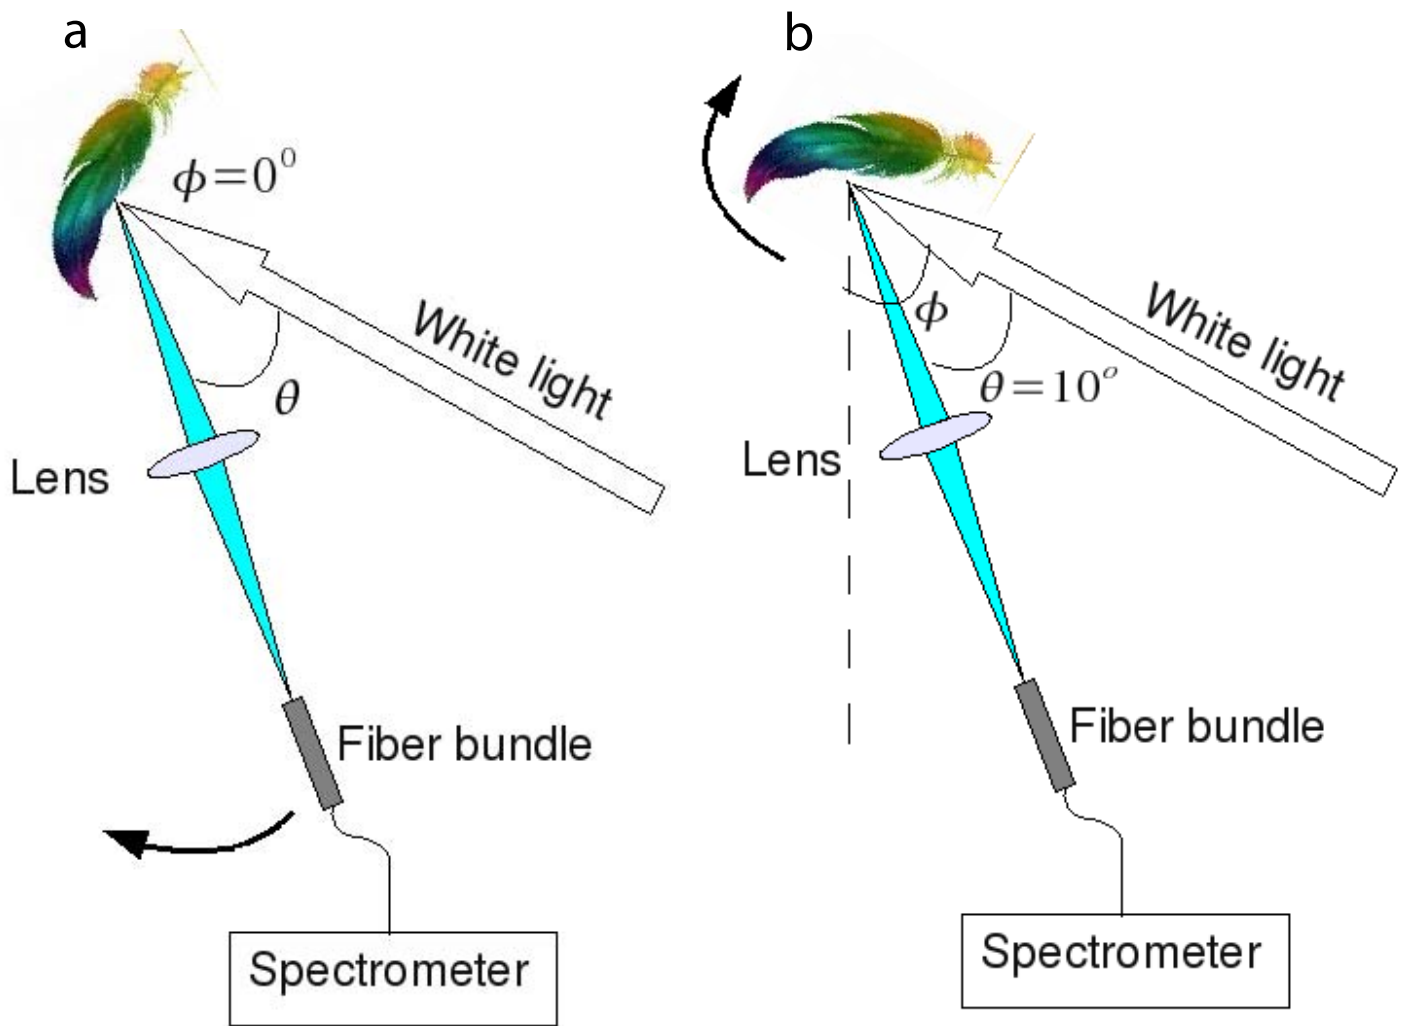

Figure S1

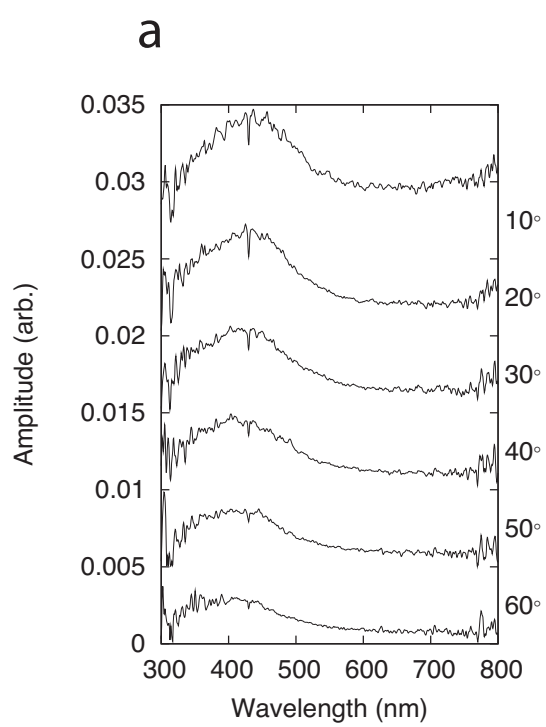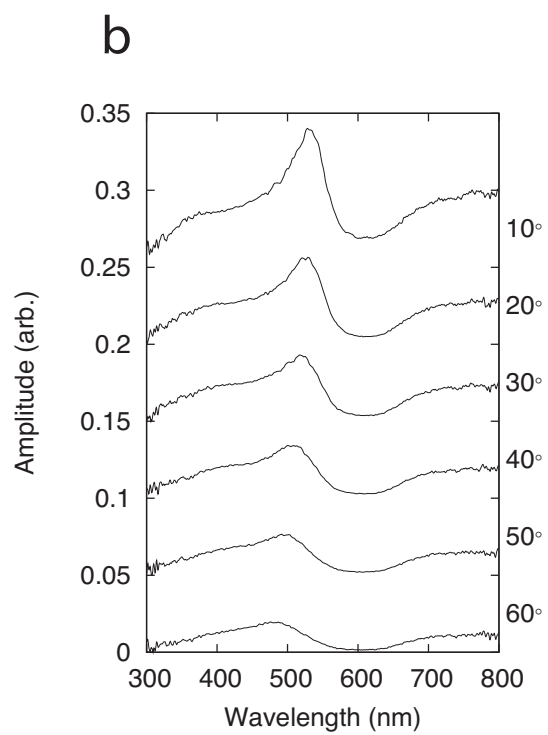

Figure S2

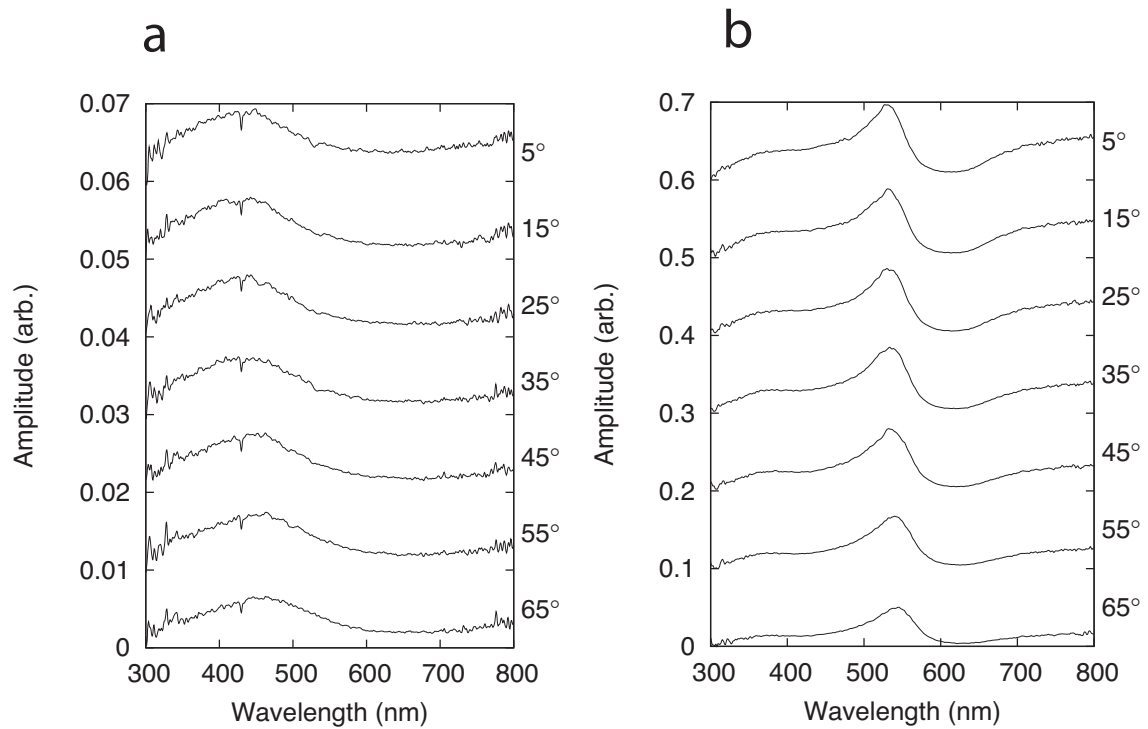

Figure S3

Supplement: b902775k-2.pdf [file b902775k-2.pdf]
